# Supplementary material for: Real-life effectiveness of omalizumab in difficult-to-treat versus severe asthma: a national cohort study in Belgium
Source: PubMed Central journal article supplement — ERJ Open Res. 2019 Nov 25;5(4):00253-2018. doi: 10.1183/23120541.00253-2018 (PMC6876130; doi:10.1183/23120541.00253-2018), 2019-11-25
Supplement: 00253-2018.SUPPLEMENT.pdf [file 00253-2018.SUPPLEMENT.pdf]

## ONLINE SUPPLEMENT

**Table S1: ATC codes for asthma drugs**

| <b>Drug class</b>                         | <b>ATC</b>                                                   |
|-------------------------------------------|--------------------------------------------------------------|
| Corticosteroids (CS) for systemic use     | H02AB (glucocorticoids, e.g. methylprednisolone)             |
| Inhaled CS (ICS)                          | R03BA (glucocorticoides, e.g. beclomethasone)                |
| LAMA (long-acting muscarinic antagonist)  | R03BB (anticholinergics, e.g.: tiotropium bromide)           |
| LABA (long acting Beta agonists)          | R03AC (e.g. salmeterol, formoterol)                          |
| LABA+ICS                                  | R03AK                                                        |
| SAMA (short acting muscarinic antagonist) | R03BB01 (e.g. ipratropium) , R03AL0 (fenoterol +ipratropium) |
| SABA (short acting Beta agonists)         | R03AC (e.g. salbutamol)                                      |
| Leukotriene receptor antagonists          | R03DC                                                        |
| Theophylline                              | R03DA04                                                      |

**Table S2: Standardized mortality rate (SMR) in patients with uncontrolled severe asthma treated with omalizumab**

| Age          | Belgian population in 2014* |                       |                         |         |                       |                         | Individuals treated with omalizumab |                       |                         |         |                       |                         | Expected number of death** |         |
|--------------|-----------------------------|-----------------------|-------------------------|---------|-----------------------|-------------------------|-------------------------------------|-----------------------|-------------------------|---------|-----------------------|-------------------------|----------------------------|---------|
|              | Men                         |                       |                         | Females |                       |                         | Men                                 |                       |                         | Females |                       |                         | Men                        | Females |
|              | Death N                     | Number of individuals | Death/1,000 individuals | Death N | Number of individuals | Death/1,000 individuals | Death N                             | Number of individuals | Death/1,000 individuals | Death N | Number of individuals | Death/1,000 individuals | Death N                    | Death N |
| 15-29        | 588                         | 1,022,900             | 0.57                    | 211     | 1,007,417             | 0.21                    | 0                                   | 83                    | 0.00                    | 0       | 133                   | 0.00                    | 0                          | 0       |
| 30-39        | 686                         | 729,127               | 0.94                    | 353     | 722,862               | 0.49                    | 1                                   | 84                    | 11.90                   | 3       | 131                   | 22.90                   | 8,680                      | 16,554  |
| 40-49        | 1,633                       | 795,390               | 2.05                    | 1,052   | 774,827               | 1.36                    | 2                                   | 158                   | 12.66                   | 1       | 207                   | 4.83                    | 10,068                     | 3,743   |
| 50-59        | 4,418                       | 778,741               | 5.67                    | 2,559   | 778,139               | 3.29                    | 2                                   | 193                   | 10.36                   | 2       | 211                   | 9.48                    | 8,070                      | 7,376   |
| 60-69        | 8,376                       | 607,550               | 13.79                   | 4,822   | 637,359               | 7.57                    | 7                                   | 141                   | 49.65                   | 1       | 156                   | 6.41                    | 30,162                     | 4,086   |
| 70-79        | 12,122                      | 370,351               | 32.73                   | 8,607   | 451,119               | 19.08                   | 5                                   | 77                    | 64.94                   | 3       | 82                    | 36.59                   | 24,049                     | 16,504  |
| > 80         | 23,371                      | 214,310               | 109.05                  | 35,307  | 390,314               | 90.46                   | 2                                   | 7                     | 285.71                  | 2       | 15                    | 133.33                  | 61,231                     | 52,042  |
| <b>Total</b> | 51,194                      | 4,518,369             | 11.33                   | 52,911  | 4,762,037             | 11.11                   | 19                                  | 743                   | 25.57                   | 12      | 950                   | 12.63                   | 142,260                    | 100,305 |

\* Demographic data of Belgian population in 2014 (<https://spma.wiv-isp.be/SitePages/FrenchReports.aspx>, \*\* Expected number of death when mortality rates of the omalizumab population are applied to the Belgian population. The overall and gender specific SMR was calculated. The overall SMR was 2.33 (242,565/104,105), the SMR for men was 2.78 (142,260/51,194) and 1.90 in females (100,305/52,911).

**Table S3: Mean annual cost per patient in the one year prior and one year after omalizumab initiation, as well stratified in patients who fulfilled and did not fulfill eligibility criteria.**

|                                                                            | Omalizumab cost | Cost of other asthma drugs* | Cost related to hospitalisations | Total cost |
|----------------------------------------------------------------------------|-----------------|-----------------------------|----------------------------------|------------|
| <i>Patients eligible to third line asthma treatment N= 380</i>             |                 |                             |                                  |            |
| Year prior to omalizumab treatment (YB)                                    | 0€              | 1,057€                      | 5,824€                           | 10,664€    |
| Year following omalizumab treatment (YA)                                   | 13,388€         | 936€                        | 4,540€                           | 23,132€    |
| YB – YA                                                                    |                 | -121€                       | -1,284€                          | 12,468€    |
| <i>Patients <b>not</b> eligible to third line asthma treatment N=1,301</i> |                 |                             |                                  |            |
| Year prior to omalizumab treatment (YB)                                    |                 | 498€                        | 2,813€                           | 6,105€     |
| Year following omalizumab treatment (YA)                                   | 11,580€         | 484€                        | 2,678€                           | 17,674€    |
| YB – YA                                                                    |                 | -14€                        | -135€                            | 11,569€    |
| <i>All patients N=1,641</i>                                                |                 |                             |                                  |            |
| Year prior to omalizumab treatment (YB)                                    | 0€              | 625€                        | 3,494€                           | 7,136€     |
| Year following omalizumab treatment (YA)                                   | 11,989€         | 586€                        | 3,099€                           | 18,908€    |
| YB – YA                                                                    |                 | -38€                        | -395€                            | 11,772€    |

YB= Year Before, YA= Year After, \* excluding cost related to use of omalizumab
